# Supplementary material for: External Validation of the Kumamoto Criteria in Transthyretin Amyloid Cardiomyopathy Screening ― A Retrospective Cohort Study ―
Source: PubMed Central journal article supplement — Circ Rep. 2022 Nov 26;4(12):579–87. doi: 10.1253/circrep.CR-22-0110 (PMC9727327; doi:10.1253/circrep.cr-22-0110), 2022-11-26
Supplement: circrep-4-579-s001.pdf [file circrep-4-579-s001.pdf]

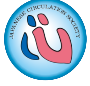

---

## **External Validation of the Kumamoto Criteria in Transthyretin Amyloid Cardiomyopathy Screening** — A Retrospective Cohort Study —

---

Yukihiro Watanabe, MD; Hiroshige Murata, MD, PhD; Hitoshi Takano, MD, PhD;  
Tomonari Kiriya, MD, PhD; Shinobu Kunugi, MD, PhD; Masato Hachisuka, MD, PhD;  
Saori Uchiyama, MD; Junya Matsuda, MD, PhD; Hiroyuki Nakano, MD;  
Yoichi Imori, MD, PhD; Kenji Yodogawa, MD, PhD; Yu-ki Iwasaki, MD, PhD;  
Eitaro Kodani, MD, PhD; Akira Shimizu, MD, PhD; Wataru Shimizu, MD, PhD

**Supplementary Table 1. Clinical Characteristics of the Study Population in Each Cohort**

|                              | <b>NMS cohort<br/>from Tokyo<br/>(n=138)</b> | <b>Fukuoka<br/>cohort<sup>10,11</sup><br/>(n=98)</b> | <b>Kochi cohort<sup>9</sup><br/>(n=150)</b> | <b>Kumamoto<br/>cohort<sup>8</sup><br/>(n=181)</b> |
|------------------------------|----------------------------------------------|------------------------------------------------------|---------------------------------------------|----------------------------------------------------|
| Age (years)                  | 73 [63–82]                                   | 79 ± 11                                              | 79 [74–84]                                  | 79 ± 6                                             |
| Male sex                     | 89 (65)                                      | 56 (57)                                              | 117 (78)                                    | 127 (70)                                           |
| Hypertension                 | 98 (71)                                      | NA                                                   | 95 (63)                                     | 109 (60)                                           |
| Atrial fibrillation          | 61 (44)                                      | 41 (42)                                              | 61 (41)                                     | 63 (35)                                            |
| Spinal canal stenosis        | 20 (15)                                      | NA                                                   | 20 (13)                                     | NA                                                 |
| Carpal tunnel syndrome       | 8 (5.8)                                      | NA                                                   | 41 (27)                                     | NA                                                 |
| Laboratory parameters        |                                              |                                                      |                                             |                                                    |
| Hs-cTnT (ng/mL)              | 0.035<br>[0.021–0.054]                       | NA                                                   | 0.057<br>[0.033–0.079]                      | 0.037<br>[0.021–0.059]                             |
| BNP (pg/mL)                  | NA                                           | NA                                                   | 304 [187–569]                               | 220 [100–428]                                      |
| NT-proBNP (pg/mL)            | 1,325<br>[395–3,524]                         | NA                                                   | NA                                          | NA                                                 |
| ECG parameters               |                                              |                                                      |                                             |                                                    |
| Wide QRS                     | 41 (30)                                      | NA                                                   | 45 (30)                                     | 53 (29)                                            |
| Prolonged PR interval        | 39 (28)                                      | NA                                                   | 24 (16)                                     | 53 (29)                                            |
| Low voltage                  | 14 (10)                                      | 7 (7.1)                                              | 45 (30)                                     | 22 (12)                                            |
| Poor R progression           | 27 (20)                                      | 28 (29)                                              | 45 (30)                                     | 27 (15)                                            |
| Echocardiographic parameters |                                              |                                                      |                                             |                                                    |
| LVEF (%)                     | 56 [44–69]                                   | NA                                                   | 52 [43–63]                                  | 55 ± 12                                            |
| LVEDD (mm)                   | 48 ± 8                                       | NA                                                   | 47 [42–53]                                  | 45 ± 8                                             |
| LVESD (mm)                   | 32 [27–41]                                   | NA                                                   | 34 [29–40]                                  | 31 ± 9                                             |
| IVS thickness (mm)           | 12 [9–13]                                    | NA                                                   | 13 [11–14]                                  | 14 ± 3                                             |
| PW thickness (mm)            | 11 [9–13]                                    | NA                                                   | 12 [10–13]                                  | 13 ± 3                                             |

Categorical data presented as n (%). Continuous data presented as median values [interquartile range] or mean values ± standard deviation.

<sup>99m</sup>Tc-PYP, technetium-99m pyrophosphate; Hs-cTnT, high-sensitivity cardiac troponin T; BNP, brain natriuretic peptide; NT-proBNP, N-terminal pro-brain natriuretic peptide; ECG, electrocardiogram; LVEF, left ventricular ejection fraction; LVEDD, left ventricular end-diastolic diameter; LVESD, left ventricular end-systolic diameter; IVS, interventricular septal; PW, posterior wall.

**Supplementary Table 2. Clinical Characteristics of Each Patients With <sup>99m</sup>Tc-PYP Scintigraphy Positive Uptake in the NMS Cohort**

| No. | Kumamoto<br>criteria | <sup>99m</sup> Tc-<br>PYP<br>grade | Age<br>(years) | Male<br>sex | NYHA<br>class | TTR<br>amyloid<br>deposition  | Genetic<br>testing | Spinal<br>canal<br>stenosis | Carpal<br>tunnel<br>syndrome | Hs-<br>cTnT<br>(ng/mL) | NT-<br>proBNP<br>(pg/mL) | QRS<br>duration<br>(ms) | PWT<br>(mm) | Monoclonal<br>protein |
|-----|----------------------|------------------------------------|----------------|-------------|---------------|-------------------------------|--------------------|-----------------------------|------------------------------|------------------------|--------------------------|-------------------------|-------------|-----------------------|
| 1   | 3                    | 3                                  | 84             | (+)         | III           | NA                            | NA                 | (+)                         | (-)                          | 0.049                  | 3104                     | 120                     | 17          | (-)                   |
| 2   | 3                    | 3                                  | 87             | (+)         | III           | Not<br>confirmed <sup>†</sup> | Wild-type          | (+)                         | (-)                          | 0.103                  | 2192                     | 140                     | 17          | (+)                   |
| 3   | 3                    | 3                                  | 82             | (+)         | III           | Confirmed                     | Wild-type          | (+)                         | (-)                          | 0.172                  | 11307                    | 150                     | 19          | (-)                   |
| 4   | 3                    | 2                                  | 76             | (+)         | II            | Confirmed                     | Wild-type          | (+)                         | (+)                          | 0.034                  | 5138                     | 122                     | 19          | (-)                   |
| 5   | 3                    | 3                                  | 79             | (+)         | II            | NA                            | NA                 | (-)                         | (-)                          | 0.038                  | 1174                     | 138                     | 14          | (-)                   |
| 6   | 2                    | 3                                  | 82             | (+)         | II            | NA                            | NA                 | (+)                         | (-)                          | 0.054                  | 211 <sup>‡</sup>         | 96                      | 14          | (-)                   |
| 7   | 2                    | 3                                  | 89             | (+)         | II            | NA                            | NA                 | (-)                         | (-)                          | 0.272                  | 871 <sup>‡</sup>         | 186                     | 12          | (-)                   |
| 8   | 2                    | 3                                  | 88             | (-)         | II            | Confirmed                     | Wild-type          | (+)                         | (-)                          | 0.075                  | 2559                     | 88                      | 15          | (-)                   |
| 9   | 2                    | 3                                  | 92             | (+)         | II            | Confirmed                     | Wild-type          | (+)                         | (-)                          | 0.081                  | 4376                     | 142                     | 7           | (-)                   |
| 10  | 2                    | 3                                  | 85             | (-)         | I             | Confirmed                     | Wild-type          | (+)                         | (-)                          | 0.037                  | 1001                     | 114                     | 15          | (-)                   |
| 11  | 2                    | 2                                  | 77             | (+)         | II            | Confirmed                     | NA                 | (-)                         | (-)                          | 0.057                  | 1863                     | 80                      | 15          | (-)                   |
| 12  | 2                    | 3                                  | 85             | (-)         | II            | Confirmed                     | Wild-type          | (-)                         | (+)                          | 0.070                  | 2904                     | 94                      | 17          | (-)                   |
| 13  | 1                    | 3                                  | 68             | (+)         | II            | Confirmed                     | Wild-type          | (+)                         | (+)                          | 0.045                  | 1819                     | 104                     | 12          | (-)                   |
| 14  | 1                    | 3                                  | 74             | (+)         | II            | Confirmed                     | Wild-type          | (+)                         | (-)                          | 0.019                  | 734                      | 142                     | 12          | (-)                   |
| 15  | 1                    | 3                                  | 84             | (+)         | II            | Confirmed                     | Wild-type          | (+)                         | (+)                          | 0.048                  | 2315                     | 104                     | 11          | (-)                   |
| 16  | 1                    | 2                                  | 83             | (+)         | II            | Confirmed                     | Wild-type          | (+)                         | (-)                          | 0.026                  | 431                      | 173                     | 11          | (-)                   |

|    |   |   |    |     |     |           |           |     |     |       |      |    |    |     |
|----|---|---|----|-----|-----|-----------|-----------|-----|-----|-------|------|----|----|-----|
| 17 | 1 | 3 | 75 | (+) | II  | Confirmed | Wild-type | (-) | (+) | 0.061 | 2426 | 78 | 13 | (-) |
| 18 | 1 | 3 | 91 | (-) | III | NA        | NA        | (-) | (-) | 0.052 | 1450 | 80 | 13 | (-) |

† The patient underwent only abdominal fat pad biopsy without endomyocardial biopsy; however, no amyloid was identified.

‡ BNP values were shown because NT-proBNP value was not evaluated.

<sup>99m</sup>Tc-PYP, technetium-99m pyrophosphate; NYHA, New York Heart Association; TTR, transthyretin; Hs-cTnT, high-sensitivity cardiac troponin T; NT-proBNP, N-terminal pro-brain natriuretic peptide; BNP, brain natriuretic peptide; PWT, posterior wall thickness.

**Supplementary Table 3. Clinical Characteristics of the NMS Cohort Over 70 Years**

|                              | All patients<br>(n=83) | <sup>99m</sup> Tc-PYP negative<br>(n=66) | <sup>99m</sup> Tc-PYP positive<br>(n=17) | P value |
|------------------------------|------------------------|------------------------------------------|------------------------------------------|---------|
| Age (years)                  | 80 [75–84]             | 80 [74–84]                               | 84 [78–88]                               | 0.019   |
| Sex (Male)                   | 51 (61)                | 38 (58)                                  | 13 (77)                                  | 0.153   |
| NYHA functional class        |                        |                                          |                                          | 0.435   |
| I                            | 15 (18)                | 14 (21)                                  | 1 (5.9)                                  |         |
| II                           | 53 (64)                | 41 (62)                                  | 12 (71)                                  |         |
| III                          | 14 (17)                | 10 (15)                                  | 4 (24)                                   |         |
| IV                           | 1 (1.2)                | 1 (1.5)                                  | 0                                        |         |
| Hypertension                 | 57 (69)                | 44 (67)                                  | 13 (77)                                  | 0.437   |
| Atrial fibrillation          | 46 (55)                | 34 (52)                                  | 12 (71)                                  | 0.158   |
| Spinal canal stenosis        | 18 (22)                | 7 (11)                                   | 11 (65)                                  | <0.001  |
| Carpal tunnel syndrome       | 6 (7.2)                | 2 (3.0)                                  | 4 (24)                                   | 0.015   |
| Pacemaker implantation       | 15 (18)                | 12 (18)                                  | 3 (18)                                   | 1.000   |
| Laboratory parameters        |                        |                                          |                                          |         |
| Albumin (g/dL)               | 3.7 [3.3–4.1]          | 3.7 [3.3–4.0]                            | 4.0 [3.6–4.4]                            | 0.036   |
| Creatinine (mg/dL)           | 1.1 [0.9–1.5]          | 1.1 [0.9–1.6]                            | 1.1 [0.9–1.4]                            | 0.782   |
| Hs-cTnT (ng/mL)              | 0.039 [0.026–0.062]    | 0.037 [0.025–0.059]                      | 0.054 [0.038–0.078]                      | 0.027   |
| NT-proBNP (pg/mL)            | 2,165 [695–4,716]      | 2,019 [620–5,629]                        | 2,315 [1,174–3,104]                      | 0.835   |
| ECG parameters               |                        |                                          |                                          |         |
| Heart rate (beats/min)       | 69 [60–79]             | 69 [62–80]                               | 60 [56–77]                               | 0.119   |
| Prolonged PR interval        | 24 (29)                | 16 (24)                                  | 8 (47)                                   | 0.078   |
| Wide QRS                     | 26 (31)                | 17 (26)                                  | 9 (53)                                   | 0.042   |
| RBBB                         | 15 (18)                | 12 (18)                                  | 3 (18)                                   | 1.000   |
| LBBB                         | 8 (9.6)                | 3 (4.5)                                  | 5 (29)                                   | 0.008   |
| Low voltage                  | 13 (16)                | 9 (14)                                   | 4 (24)                                   | 0.453   |
| Poor R progression           | 18 (22)                | 12 (18)                                  | 6 (35)                                   | 0.184   |
| Echocardiographic parameters |                        |                                          |                                          |         |
| LVEF (%)                     | 61 [45–69]             | 62 [45–69]                               | 56 [45–69]                               | 0.611   |
| LVEDD (mm)                   | 46 ± 7                 | 47 ± 7                                   | 42 ± 6                                   | 0.015   |
| LVESD (mm)                   | 30 [25–38]             | 31 [25–39]                               | 28 [25–36]                               | 0.400   |
| IVS thickness (mm)           | 12 [10–14]             | 12 [10–13]                               | 13 [12–15]                               | 0.031   |

|                                  |               |               |               |        |
|----------------------------------|---------------|---------------|---------------|--------|
| PW thickness (mm)                | 11 [9–13]     | 10 [9–12]     | 14 [12–17]    | <0.001 |
| Left atrium diameter (mm)        | 43 ± 7        | 43 ± 8        | 43 ± 7        | 0.829  |
| E/A ratio                        | 0.9 [0.6–1.6] | 0.8 [0.5–1.3] | 1.6 [1.0–3.0] | 0.008  |
| E-wave deceleration time<br>(ms) | 196 [155–258] | 187 [147–257] | 211 [169–314] | 0.232  |
| E/e' ratio                       | 18 [13–26]    | 17 [13–25]    | 20 [15–32]    | 0.149  |
| Aortic stenosis                  | 13 (16)       | 11 (17)       | 2 (12)        | 1.000  |
| Pericardial effusion             | 27 (33)       | 22 (33)       | 5 (29)        | 0.758  |

Categorical data presented as n (%). Continuous data presented as median values [interquartile range] or mean values ± standard deviation in an appropriate manner.

<sup>99m</sup>Tc-PYP, technetium-99m pyrophosphate; NYHA, New York Heart Association; Hs-cTnT, high-sensitivity cardiac troponin T; NT-proBNP, N-terminal pro-brain natriuretic peptide; ECG, electrocardiogram; RBBB, right bundle branch block; LBBB, left bundle branch block; LVEF, left ventricular ejection fraction; LVEDD, left ventricular end-diastolic diameter; LVESD, left ventricular end-systolic diameter; IVS, interventricular septal; PW, posterior wall.
